# Supplementary material for: Stability Modification of Dye-sensitized Solar Cells by Ruthenium Dyes Embedded on Eggshell Membranes
Source: MDPI journal article supplement (doi:10.3390/ma16206654), 2023-10-11
Supplement: s1 [file s1]

# Stability Modification of Dye-sensitized Solar Cells by Ruthenium Dyes Embedded on Eggshell Membranes

Naoki Tanifuji \*, Takeshi Shimizu\*, Akihiro Shimizu, Kaho Shimizu, Kizuna Abe, Miki Tanaka, Heng Wang and Hirofumi Yoshikawa \*

<sup>1</sup> Chemistry and Biochemistry Division, Department of Integrated Engineering, National Institute of Technology, Yonago College, 4448 Hikona-cho, Yonago 683-8502, Tottori, Japan

<sup>2</sup> Department of Materials Science, National Institute of Technology, Yonago College, Yonago 683-8502, Tottori, Japan; k.shimigon@gmail.com (K.S.); s160163r@gmail.com (K.A.)

<sup>3</sup> School of Material and Chemical Engineering, Zhengzhou University of Light Industry, Zhengzhou 450002, China

<sup>4</sup> School of Engineering, Kwansei Gakuin University, 2-1 Gakuen, Sanda 669-1337, Hyogo, Japan

\* Correspondence: tanifuji@yonago-k.ac.jp (N.T.); t-shimizu@yonago-k.ac.jp (T.S.); yoshikawah@kwansei.ac.jp (H.Y.)

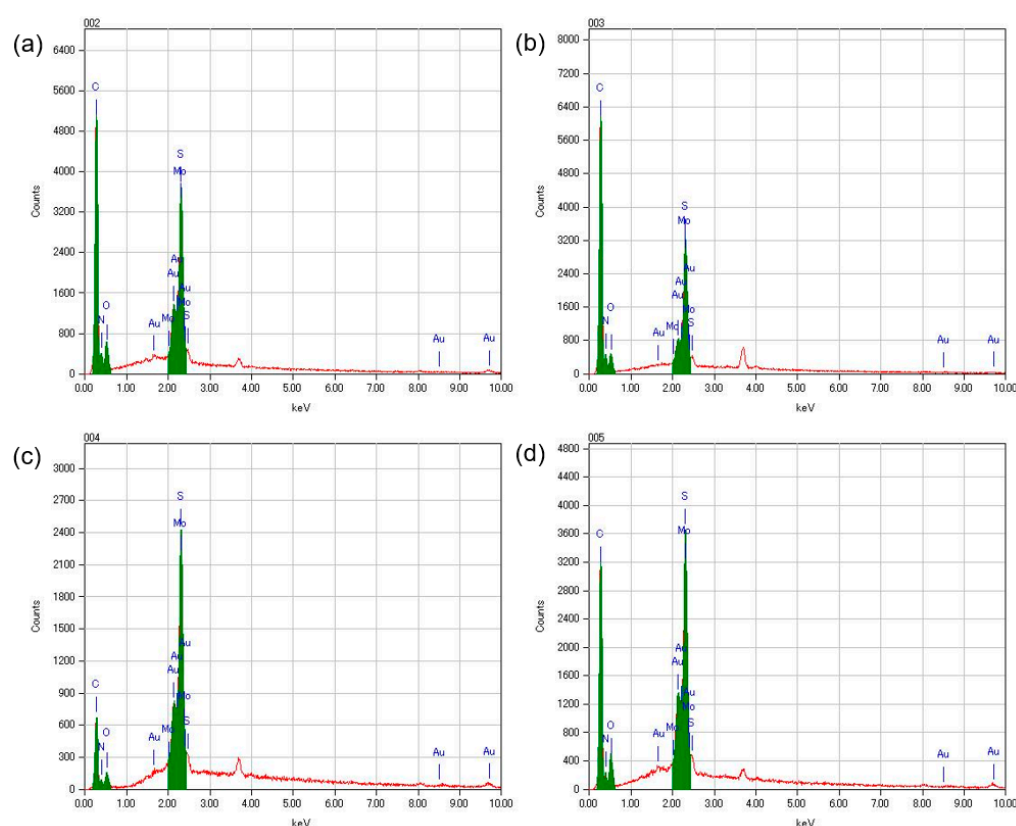

Figure S1. EDX spectra at the position 002 (a), 003 (b), 004 (c), and 005 (d) of ESM.

**Table S1.** Elemental analysis at the position 002 of ESM.

| Element | Energy [keV] | Atomic ratio [%] |
|---------|--------------|------------------|
| C       | 0.277        | 72.82            |
| N       | 0.392        | 12.96            |
| O       | 0.525        | 7.22             |
| S       | 2.307        | 5.23             |
| Mo      | 2.293        | 0.96             |
| Au      | 2.121        | 0.81             |

**Table S2.** Elemental analysis at the position 003 of ESM.

| Element | Energy [keV] | Atomic ratio [%] |
|---------|--------------|------------------|
| C       | 0.277        | 72.10            |
| N       | 0.392        | 16.56            |
| O       | 0.525        | 6.02             |
| S       | 2.307        | 4.26             |
| Mo      | 2.293        | 0.67             |
| Au      | 2.121        | 0.40             |

**Table S3.** Elemental analysis at the position 004 of ESM.

| Element | Energy [keV] | Atomic Ratio [%] |
|---------|--------------|------------------|
| C       | 0.277        | 67.60            |
| N       | 0.392        | 9.00             |
| O       | 0.525        | 5.42             |
| S       | 2.307        | 13.71            |
| Mo      | 2.293        | 2.46             |
| Au      | 2.121        | 1.80             |

**Table S4.** Elemental analysis at the position 005 of ESM.

| Element | Energy [keV] | Atomic Ratio [%] |
|---------|--------------|------------------|
| C       | 0.277        | 76.85            |
| N       | 0.392        | 6.69             |
| O       | 0.525        | 7.18             |
| S       | 2.307        | 7.17             |
| Mo      | 2.293        | 1.03             |
| Au      | 2.121        | 1.07             |

**Table S5.** The comparison among the conversion efficiencies of DSSCs.

| Dye   Metal Oxide                                                                                                               | Conversion Efficiency [%] | Reference |
|---------------------------------------------------------------------------------------------------------------------------------|---------------------------|-----------|
| [Ru(bpy) <sub>2</sub> (CN) <sub>2</sub> ] <sub>2</sub> Ru(bpy(COO) <sub>2</sub> ) <sub>2</sub> <sup>2-</sup>   TiO <sub>2</sub> | 7.1-7.9                   | [1]       |
| N719   TiO <sub>2</sub>                                                                                                         | >11                       | [2]       |
| N719   TiO <sub>2</sub> -bamboo-charcoal-powder                                                                                 | 5.4                       | [3]       |
| Anthocyanin dye   TiO <sub>2</sub> -WO <sub>3</sub>                                                                             | 1.8                       | [4]       |
| N719-adsorbed ESM   TiO <sub>2</sub>                                                                                            | 0.008                     | This work |

## References

1. O'Regan B. and Gratzel M. A low-cost, high-efficiency solar cell based on dye-sensitized colloidal TiO<sub>2</sub> films. *Nature* **1991**, 354, 737–740.
2. Grätzel, M. Solar energy conversion by dye-sensitized photovoltaic cells. *Inorg. Chem.* **2005**, 44, 6841–6851.
3. Chou, C. S.; Chen, C. Y.; Lin, S. H.; Lu, W. H.; and Wu, P.; Preparation of TiO<sub>2</sub>/bamboo-charcoal-powder composite particles and their applications in dye-sensitized solar cells. *Adv. Powder Technol.* **2015**, 26, 711–717.
4. Chawla, P.; Srivastava, A.; and Tripathi, M.; Performance of chitosan based polymer electrolyte for natural dye sensitized solar cell. *Environ. Prog. Sustain. Energy* **2019**, 38, 630–634.
